# Supplementary material
Source: PubMed Central journal article supplement (PMC5730406)
Supplement: NIHMS722985-supplement-Supplementary_Figure_1.pdf [file NIHMS722985-supplement-Supplementary_Figure_1.pdf]

## **Requirement for Itk kinase activity for Th1, Th2, Th17 and iNKT cell cytokine production revealed by an allele sensitive mutant**

Arun Kannan, YongChan Lee, Qian Qi, Weishan Huang, Ah-Reum Jeong<sup>†</sup>, Sarah Ohnigian and Avery August<sup>1</sup>

Program in Infection and Pathobiology, Department of Microbiology & Immunology, Cornell University, Ithaca, NY, 14853, <sup>†</sup>Keck School of Medicine of University of Southern California, Los Angeles, CA 90089

<sup>1</sup>Address correspondence to:

Dr. Avery August  
Department of Microbiology & Immunology  
College of Veterinary Medicine  
VMC 5171  
Cornell University  
Ithaca, NY  
(607) 253-3402 (Ofc)  
(607) 253-4058 (Fax)  
email: [averyaugust@cornell.edu](mailto:averyaugust@cornell.edu)

**Supplemental Figure 1**

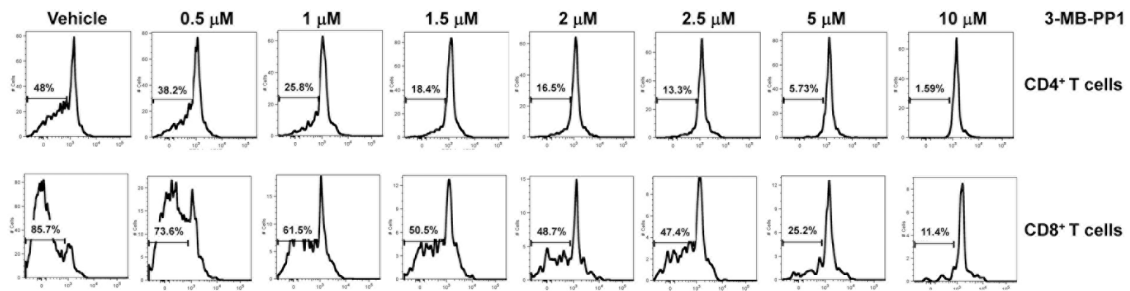

**Supplemental Figure 1. CD8<sup>+</sup> T cells proliferate more than CD4<sup>+</sup> T cells in response to CD3/CD28 stimulation.** Splenocytes from *Tg(CD2-hItkas)Itk<sup>-/-</sup>* mice were loaded with CFSE and stimulated with  $\alpha$ -CD3/CD28 for 72 hrs in the presence of varying concentrations of 3-MB-PP1 and CFSE dilution of CD4<sup>+</sup>TCR $\beta$ <sup>+</sup> (Top) and CD8<sup>+</sup>TCR $\beta$ <sup>+</sup> cells (bottom) determined.
